# Supplementary material for: Analytical validation of a portable human Accu-Chek glucometer in honeybee hemolymph
Source: PubMed Central journal article supplement — J Vet Diagn Invest. 2022 Aug 21;34(5):789–95. doi: 10.1177/10406387221117233 (PMC9446297; doi:10.1177/10406387221117233), 2022-08-21
Supplement: sj-pdf-1-vdi-10.1177_10406387221117233.pdf [file sj-pdf-1-vdi-10.1177_10406387221117233.pdf]

**Supplemental Table 1.** Honeybee glucose concentration measured by the Accu-Chek glucometer and the UniCel DxC 600 spectrophotometer in commercial trehalose and fructose solutions (solvent: 0.9% NaCl).

| Solution              | Value measured by Accu-Chek glucometer, mmol/L | Value measured by UniCel DxC 600 spectrophotometer, mmol/L |
|-----------------------|------------------------------------------------|------------------------------------------------------------|
| Trehalose (10 mmol/L) | Low                                            | 0.1                                                        |
| Fructose (20 mmol/L)  | Low                                            | 0.3                                                        |

The enzymatic protocol was executed as follows:

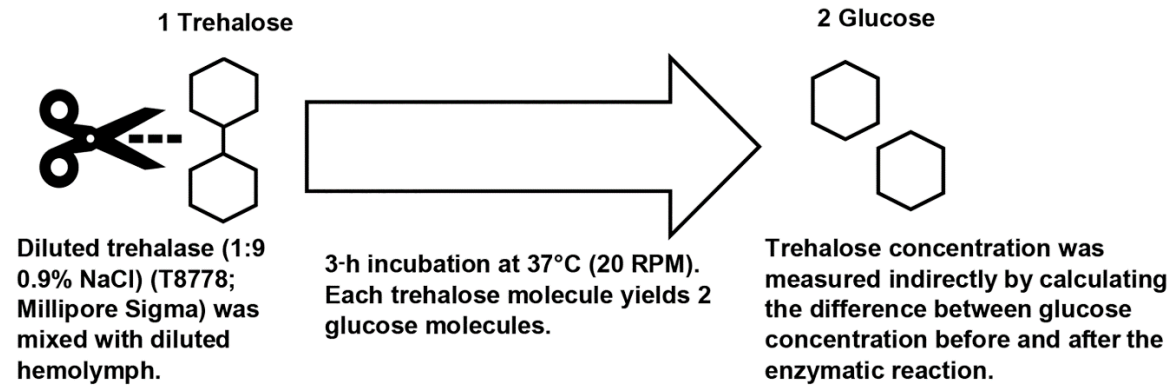

**Supplemental Figure 1.** Trehalase enzymatic protocol.
